# Supplementary material for: Caffeinated soda intake in children is associated with neurobehavioral risk factors for substance misuse
Source: bioRxiv or medRxiv preprint supplement (doi:10.1101/2021.02.17.431718), 2023-06-14
Supplement: Supplementary file [file media-1.pdf]

**Supplemental material for**

**“Daily caffeinated soda intake is associated with impaired working memory and higher impulsivity in children”**

**Authors:**

Mina Kwon<sup>1</sup>, Hyeonjin Kim<sup>1</sup>, Jaeyeong Yang<sup>1</sup>, Jihyun Hur<sup>1</sup>, Tae-Ho Lee<sup>2</sup>, &  
Woo-Young Ahn<sup>1</sup>

<sup>1</sup>Department of Psychology, Seoul National University, Seoul, Korea

<sup>2</sup>Department of Psychology, Virginia Polytechnic Institute and State University, Blacksburg, VA

**Corresponding author:**

Woo-Young Ahn, Ph.D.

Department of Psychology

Seoul National University

Seoul, Korea 08826

Tel: +82-2-880-2538, Fax: +82-2-877-6428. E-mail: [wahn55@snu.ac.kr](mailto:wahn55@snu.ac.kr)

We examined differences in all measures between the four groups (non-drinking, weekly-drinking, monthly-drinking, daily-drinking) using an analysis of variance (ANOVA), and made post-hoc pairwise comparisons using Tukey's test. The main objective was to test whether the three soda-drinking groups (monthly-drinking, weekly-drinking, daily-drinking groups) differed significantly from the non-drinking group.

ANOVA revealed a significant main effect of group on soda intake per week ( $F(3, 3962)=1161, p<0.001$ ), and all demographic factors, including family income ( $F(3, 3962)=46.06, p<0.001$ ), parental education ( $F(3, 3962)=51.50, p<0.001$ ), parental monitoring ( $F(3, 3962)=7.88, p<0.001$ ), BMI ( $F(3, 3962)=19.37, p<0.001$ ), physical activity ( $F(3, 3962)=11.47, p<0.001$ ), amount of sleep ( $F(3, 3962)=33.19, p<0.001$ ), externalizing behaviors ( $F(3, 3962)=7.74, p<0.001$ ), and internalizing behaviors ( $F(3, 3962)=3.31, p=0.019$ ).

There was a main effect of groups for all behavioral measures of WM (List Sorting Test:  $F(3, 3962)=14.16, p<0.001$ ; Card Sort Test:  $F(3, 3962)=5.68, p<0.001$ ; [EN-Back] 2-back:  $F(3, 3962)=3.74, p=0.011$ ; [EN-Back] 0-back:  $F(3, 3962)=5.60, p<0.001$ ), and except for the left amygdala ( $F(3, 3962)=4.69, p<0.001$ ), there was no main effect for all neural data (R hippocampus:  $F(3, 3962)=1.46, p=0.224$ ; L hippocampus:  $F(3, 3962)=1.08, p=0.356$ ; R amygdala:  $F(3, 3962)=2.56, p=0.054$ ; R DLPFC:  $F(3, 3962)=0.16, p=0.923$ ; L DLPFC:  $F(3, 3962)=0.14, p=0.936$ ). There was a significant main effect on all behavioral measures of impulsivity except for the SSRT (SSRT:  $F(3, 3962)=1.70, p=0.165$ ; UPPS-P:  $F(3, 3962)=12.62, p<0.001$ ; BIS:  $F(3, 3962)=10.67, p<0.001$ ; BAS:  $F(3, 3962)=16.67, p<0.001$ ), and there was no main effect on any neural data (R caudal ACC:  $F(3, 3962)=0.58, p=0.631$ ; L caudal ACC:  $F(3, 3962)=0.81, p=0.489$ ; R IFG:  $F(3, 3962)=0.53, p=0.661$ ; L IFG:  $F(3, 3962)=2.12, p=0.095$ ). In the reward processing measures, a main effect of groups was found for all neural data except for activity in the right NAc (L PCC:  $F(3, 3962)=6.77, p<0.001$ ; R PCC:  $F(3, 3962)=5.79, p<0.001$ ; L NAc:  $F(3, 3962)=3.21, p=0.022$ ; R NAc:  $F(3, 3962)=0.72, p=0.539$ ), and there was no main effect on behavioral data ([MID] difference in hit rates between reward vs. neutral trials:  $F(3, 3962)=2.34, p=0.072$ ; [MID] difference in hit rates between loss vs. neutral trials:  $F(3, 3962)=1.99, p=0.113$ ).

**Table S1** shows the post-hoc pairwise comparison results of demographic factors among the four groups (non-drinking, monthly-drinking, weekly-drinking, daily-drinking). Several demographic factors were significantly different between the four groups. Higher caffeinated soda intake was associated with a lower SES (parental income & parental education), lower parental monitoring, higher BMI, lower amount of physical activity, and less sleep. Low WM (lower performance in the List Sorting Test, Card Sort Test, and EN-Back Task), high impulsivity (higher score in the UPPS-P and BIS/BAS), and indifference toward monetary rewards (smaller difference in performance between the reward vs. neutral trials and loss vs. neutral trials) were found in the daily-drinking group compared to the non-drinking group. This supports the idea that daily consumption of caffeinated soda might be a risk factor and a predictor of future substance misuse. Among the ROIs, hyperactivation of the amygdala was found in the daily-drinking group (compared with the non-drinking group) during the EN-Back Task.

**Table S1.**

Baseline characteristics of participants

| variable                     | Non-drinking<br>(0 can) | Monthly-drinking<br>(< 1 can /week) | Weekly-drinking<br>(< 7 can / week) | Daily-drinking<br>(≥ 7 can / week) |
|------------------------------|-------------------------|-------------------------------------|-------------------------------------|------------------------------------|
| Sample size                  | 1640                    | 1721                                | 464                                 | 141                                |
| Soda intake / week           | 0                       | 0.46 (0.01)***                      | 2.86 (0.06)***                      | 14.92 (1.32)***                    |
| <b>demographic variables</b> |                         |                                     |                                     |                                    |
| Women, No. (%)               | 917 (0.56)              | 820 (0.48)                          | 173 (0.37)                          | 66 (0.47)                          |
| Age                          | 9.5 (0.01)              | 9.55 (0.01)**                       | 9.64 (0.02)***                      | 9.49 (0.04)                        |
| Family income                | 8.06 (0.04)             | 7.8 (0.05)***                       | 7.07 (0.11)***                      | 6.65 (0.21)***                     |
| Parental education           | 17.4 (0.05)             | 16.9 (0.06)***                      | 16.19 (0.11)***                     | 15.83 (0.22)***                    |
| Parental monitoring          | 4.47 (0.01)             | 4.44 (0.01)                         | 4.37 (0.02)***                      | 4.35 (0.05)*                       |
| Family history (drug)        | 0.29 (0.01)             | 0.3 (0.01)                          | 0.36 (0.02)*                        | 0.34 (0.04)                        |
| Family history (alcohol)     | 0.43 (0.01)             | 0.48 (0.01)**                       | 0.46 (0.02)                         | 0.42 (0.04)                        |
| BMI                          | 17.9 (0.09)             | 18.5 (0.09)***                      | 19.11 (0.2)***                      | 19.6 (0.45)***                     |
| Physical activity            | 4.20 (0.06)             | 3.94 (0.06)*                        | 3.52 (0.11)***                      | 3.44 (0.20)**                      |
| Amount of sleep              | 1.50 (0.02)             | 1.61 (0.02)***                      | 1.81 (0.04)***                      | 1.93 (0.08)***                     |
| Externalizing behaviors      | 44.01 (0.23)            | 44.12 (0.23)                        | 46.14 (0.48)***                     | 45.93 (0.91)                       |
| Internalizing behaviors      | 44.61 (0.26)            | 44.10 (0.25)*                       | 45.84 (0.51)                        | 46.62 (0.93)                       |
| <b>Working memory</b>        |                         |                                     |                                     |                                    |
| <b>Behavioral measures</b>   |                         |                                     |                                     |                                    |
| List Sorting Test            | 104.61 (0.34)           | 103.54 (0.33)                       | 101.59 (0.63)***                    | 97.91 (1.34)***                    |
| Card Sort Test               | 99.88 (0.38)            | 99.39 (0.37)                        | 95.64 (1.23)*                       | 95.57 (1.15)**                     |
| [EN-Back] (2-back)           | 0.81 (0.002)            | 0.80 (0.002)                        | 0.80 (0.004)                        | 0.79 (0.007)*                      |
| [EN-Back] (0-back)           | 0.88 (0.002)            | 0.88 (0.002)                        | 0.87 (0.004)                        | 0.85 (0.008)***                    |
| <b>fMRI data</b>             |                         |                                     |                                     |                                    |
| [EN-Back] Right hippocampus  | -0.07 (0.005)           | -0.07 (0.005)                       | -0.06 (0.01)                        | -0.047 (0.02)                      |
| [EN-Back] Left hippocampus   | -0.079 (0.005)          | -0.082 (0.005)                      | -0.07 (0.01)                        | -0.057 (0.018)                     |
| [EN-Back] Right DLPFC        | 0.062 (0.006)           | 0.059 (0.006)                       | 0.064 (0.012)                       | 0.051 (0.021)                      |
| [EN-Back] Left DLPFC         | 0.042 (0.005)           | 0.04 (0.006)                        | 0.044 (0.012)                       | 0.031 (0.02)                       |
| [EN-Back] Right amygdala     | -0.071 (0.007)          | -0.075 (0.007)                      | 0.043 (0.014)                       | -0.026 (0.029)                     |
| [EN-Back] Left amygdala      | -0.066 (0.006)          | -0.075 (0.006)                      | -0.044 (0.012)                      | -0.003 (0.024)*                    |
| <b>Impulsivity</b>           |                         |                                     |                                     |                                    |
| <b>Behavioral measures</b>   |                         |                                     |                                     |                                    |
| UPPS-P                       | 39.70 (0.18)            | 40.82 (0.18)***                     | 41.56 (0.37)***                     | 41.94 (0.63)**                     |
| BIS                          | 24.86 (0.19)            | 25.80 (0.18)**                      | 26.48 (0.36)***                     | 27.55 (0.68)***                    |
| BAS                          | 19.58 (0.16)            | 20.54 (0.16)***                     | 21.35 (0.31)***                     | 22.53 (0.58)***                    |
| [SST] SSRT                   | 299.51 (1.62)           | 302.29 (1.55)                       | 297.27 (2.87)                       | 308.76 (5.59)                      |
| <b>fMRI data</b>             |                         |                                     |                                     |                                    |
| [SST] Right caudal ACC       | 0.068 (0.003)           | 0.073 (0.003)                       | 0.072 (0.007)                       | 0.062 (0.012)                      |
| [SST] Left caudal ACC        | 0.062 (0.003)           | 0.068 (0.003)                       | 0.07 (0.007)                        | 0.061(0.01)                        |
| [SST] Right IFG              | 0.103 (0.004)           | 0.109 (0.004)                       | 0.101 (0.007)                       | 0.104 (0.014)                      |
| [SST] Left IFG               | 0.057 (0.003)           | 0.069 (0.003)*                      | 0.058 (0.006)                       | 0.059 (0.013)                      |
| <b>Reward processing</b>     |                         |                                     |                                     |                                    |
| <b>Behavioral measures</b>   |                         |                                     |                                     |                                    |
| Cash Choice Task             | 1.61 (0.01)             | 1.59 (0.01)                         | 1.61 (0.02)                         | 1.60 (0.04)                        |
| [MID] earned money           | 21.23 (0.30)            | 22.14 (0.29)*                       | 21.983(0.58)                        | 22.34 (1.11)                       |
| [MID] reward vs. neutral     | 0.12 (0.003)            | 0.11 (0.003)                        | 0.106 (0.006)                       | 0.09 (0.01)*                       |

|                                      |               |                     |                 |                |
|--------------------------------------|---------------|---------------------|-----------------|----------------|
| <b>[MID] loss vs. neutral</b>        | 0.095 (0.003) | 0.093 (0.003)       | 0.083 (0.006)   | 0.071(0.012)*  |
| <b>fMRI data</b>                     |               |                     |                 |                |
| <b>[MID] Right PCC</b>               | 0.024 (0.004) | -8.7e-05 (0.004)*** | 0.006 (0.008)*  | 0.004 (0.015)  |
| <b>[MID] Left PCC</b>                | 0.014 (0.004) | -0.011 (0.004)***   | -0.005 (0.008)* | -0.013 (0.014) |
| <b>[MID] Right nucleus accumbens</b> | 0.060 (0.005) | 0.05 (0.005)        | 0.057 (0.01)    | 0.063 (0.02)   |
| <b>[MID] Left nucleus accumbens</b>  | 0.082 (0.005) | 0.063 (0.005)       | 0.050 (0.02)    | 0.044 (0.017)  |

*Note.* Data are Mean (Standard Error): \*:  $p < 0.05$ , \*\*:  $p < 0.01$ ; \*\*\*:  $p < 0.001$  (each soda drinking groups (monthly-drinking, weekly-drinking, daily-drinking) compared with the non-drinking group)

*Abbreviations.* BMI, Body Mass Index; EN-Back, Emotional N-Back Task; DLPFC, Dorsal Lateral Prefrontal Cortex; SST, Stop Signal Task; ACC, Anterior Cingulate Cortex; IFG, Inferior Frontal Gyrus; MID, Monetary Incentive Delay Task; [MID] reward vs. neutral, difference in percentage of correct trials between reward trial and neutral trial; [MID] loss vs. neutral, difference in percentage of correct trials between loss trial and neutral trial; PCC, Posterior Cingulate Cortex.
